1 **Title Page**

2 **Full title: Availability and Utilization of Sexual and Reproductive Health Services among**  
3 **Adolescents of Godawari Municipality, Nepal: a Cross sectional Study**

4 **Short Title: Sexual and Reproductive Health Service Utilization**

5 **Authors:**

6 **1. Laxmi Gautam: [laxmi.dp26@gmail.com](mailto:laxmi.dp26@gmail.com)/[45laxmigautam@gmail.com](mailto:45laxmigautam@gmail.com)**

7 **2. Aastha Maharjan: [aasthamaharjan765@gmail.com](mailto:aasthamaharjan765@gmail.com)**

8 **3. Harikrishna Bhattarai: [hkrishnabhattarai@gmail.com](mailto:hkrishnabhattarai@gmail.com)**

9 **4. Sujan Gautam: [gautamsujan@gmail.com](mailto:gautamsujan@gmail.com)**

10 **Affiliation: Department of Public Health, Manmohan Memorial Institute of Health**  
11 **Sciences, Tribhuvan University, Kathmandu, Nepal**

12

13

14 **Corresponding Author: Laxmi Gautam: [laxmi.dp26@gmail.com](mailto:laxmi.dp26@gmail.com)/[45laxmigautam@gmail.com](mailto:45laxmigautam@gmail.com) (LG)**  
15

16

17

18

19

20

21

22

23

24

25

26

27

## 28 Abstract

29 **Background:** Adolescent sexual and reproductive health is getting due attention in developing  
30 countries because investing among adolescent can bring multiple benefits. This study aims to  
31 assess the availability, utilization and explore different factors affecting the utilization of SRH  
32 services by adolescents of Godawari Municipality.

33 **Methods:** cross-sectional, mixed-method study was conducted using the Anderson's model of  
34 health service utilization in 3 government secondary schools and three local health institutions in  
35 Godawari Municipality. A self-administered questionnaire was used among adolescents aged 15-  
36 19 (n = 416) and Key Informants Interview (KII) and observation were done in health institutions.  
37 Quantitative data was analyzed in Statistical Package for Social Sciences (SPSS) version 16 and  
38 thematic analysis was done for qualitative data.

### 39 Results:

40 The mean age of the respondents was 17.31±0.99 years. Nearly one-third of them (30.63%) had  
41 not heard about Adolescents Friendly Health Services. Knowledge of ASRH, AFHS (AOR=2.814,  
42 95% C.I=1.129-7.013) and conversation with parents (AOR=2.069, 95% C.I=1.094-3.912),  
43 availability of ASRH (AOR=2.801, 95% C.I=0.810-9.687) had significant relationship with  
44 utilization of Health Services. The adolescents' perceived feeling of the need for ASRH services  
45 is significantly associated with the utilization of ASRH services (p=< .0001). Only 13.22% of them  
46 had ever used ASRH services and the reasons for not using services was the lack of realization of  
47 the need of services (60.39%) while 14.55% of them felt that privacy was not maintained at all.  
48 The KII found the number of adolescents visiting Health Facility (HF) was very less and those  
49 visiting for the SRH related services were rare. The observation showed none of the HF met the  
50 adolescents friendly criteria set by government even when they were once certified.

51 **Conclusion:** Knowledge of respondents and their parents as well as availability of the services  
52 had significant role in the utilization of ASRH service by the adolescents. Awareness about the  
53 importance of health care services among the adolescent and the availability of services is  
54 essential.

55 **Key Words:** *Adolescent; Adolescents Sexual and Reproductive Health; Availability; Utilization*

## 56 Introduction

57 The World Health Organization (WHO) definition officially designates an adolescent as

58 someone between the ages of 10 and 19. Adolescents experience rapid physical, cognitive and  
59 psychosocial growth. This affects how they feel, think, make decisions, and interact with the world  
60 around them.(1) ASRH refers to the physical and emotional wellbeing of adolescents and includes  
61 their ability to remain free from unwanted pregnancy, unsafe abortion, Sexually Transmitted  
62 Infections (including HIV/AIDS), and all forms of sexual violence and coercion.(2) The health  
63 needs of young people are special so they need special services called Adolescents Friendly Health  
64 Services (AFHS), which are defined by the friendly environment and favorable condition where  
65 adolescents get access to ASRH services in accessible, equitable, acceptable, appropriate, and  
66 effective manner.(3) However, little information exists regarding in what Nepalese adolescents  
67 perceive as their SRH needs, their service utilization patterns and factors which act as barriers or  
68 facilitates use of existing services.(4)

69 Adolescents in Nepal do not have adequate access to information and access to services which is  
70 further exacerbated by the little sex education in schools and hardly open discussion about sex  
71 and sexuality in families and society.(5) There are limited sessions on adolescent's sexual and  
72 reproductive health in school curriculum. Therefore, adolescents are unable to receive complete  
73 information about their physiological, psychological and emotional changes that occur during  
74 puberty.(6) To meet the health needs of adolescents, the Nepal government launched a national  
75 program in 2010 to provide adolescent-friendly sexual and reproductive health services as part of  
76 its five-year health sector plans. (7) Nepal Demographic Health Survey (NDHS) 2022 prevailed  
77 that 14% of women age 15–19 have ever been pregnant, 10% have had a live birth, and 2% have  
78 had a pregnancy loss. Two percent each of women and men age 15–19 had sexual intercourse  
79 before age 15. Three percent of women age 15–19 were married by age 15, and 1% had been  
80 pregnant by that age. (8) Although SRH education and services are provided to young people,  
81 unplanned pregnancy, unsafe abortion, sexually transmitted infections are commonly existed  
82 among adolescents in Nepal, indicating underutilization of sexual health services by young  
83 people. Health facilities have apparently failed to provide young people with specialized sexual  
84 health education and services.(9) However, despite the interest of young people in obtaining  
85 relevant information and friendly services, the provision of sexual and reproductive health  
86 services in Nepal is very inadequate. However, little information exists at the national level  
87 regarding what Nepalese adolescents perceive as their SRH needs, their service utilization  
88 patterns and factors which act as barriers or facilitates use of existing services.(10) Global

89 evidence shows that programs such as comprehensive sexuality education and youth-friendly  
90 services have a positive influence on SRH service utilization.(11) Poor sexual and reproductive  
91 health knowledge, the lack of youth-friendly services, lack of confidentiality of services,  
92 experiences of shame, and health care provider attitudes also have an influence on SRH service  
93 utilization by adolescents.(12) Correct evidence is crucial to properly plan SRH services for  
94 Nepalese adolescents. Amongst the many means to measure adolescents' needs, their own reports  
95 of health behaviors and lifestyles and utilization of health services are especially valuable. So,  
96 this study aims to assess the availability and utilization of ASRH services and explores different  
97 factors affecting the utilization of the services related to individual, health care institution and  
98 service providers.

## 99 **Materials and Methods**

100 A descriptive cross-sectional study was conducted to assess the availability and utilization  
101 of ASRH services by using quantitative and qualitative methods from November 2021 to January  
102 2022. The dependent variable was the availability and utilization of SRH services by adolescents  
103 and the independent variables were socio-demographic factors, health facility, service provider-  
104 related factors, SRH information-related factors, and so on.

105 For the quantitative study, 416 school-going adolescents aged 15 to 19, studying in classes 11 and  
106 12 of three government secondary schools were selected in Godawari Municipality, Lalitpur. The  
107 study was conducted in three government schools selected randomly from 10 schools which were  
108 located in different 3 wards out of 14 wards of Godawari Municipality. The sample size was  
109 calculated using the formula for infinite population developed by Cochran with a 95% CI, 5%  
110 allowable error, and a non-response rate of 10%. The schools were selected by lottery method and  
111 the number of students of each school and class was selected by Probability Proportionate  
112 Sampling (PPS). The individual participants were selected by lottery method. For the qualitative  
113 study three local health institutions and the health service provider of those institutions were  
114 selected purposively that were located around the selected schools among four adolescent-friendly  
115 certified health institutions available in the municipality.

116 During data collection, permission was taken from the Municipality health section and education  
117 section, and information about schools and health institutions was gathered. The information about

118 the adolescents-friendly certified health institutions of the municipality was collected from the  
119 family welfare division. Then, schools were contacted and permission was taken from the school  
120 administration before collecting data from the students.

121 Quantitative data was collected using a self-administered, semi-structured questionnaire and the  
122 qualitative data by a face-to-face interview using an interview guide. The health institutions were  
123 observed using a checklist. The data collection tools were developed after an extensive literature  
124 review, based on various previously conducted studies and were pretested in Kageswori Manohara  
125 Municipality. The observation checklist was adapted from the Government of Nepal's criteria for  
126 Adolescent Friendly Health Institutions. Pretesting was done among 10% of the sample size and  
127 in one health institution to check instruments and a few modifications were made. The  
128 questionnaire was translated into the Nepali language.

129 For the analysis of quantitative data, IBM-SPSS software version 16 was used. Descriptive  
130 statistics were used to study the characteristics of variables and Chi-square test was used to test  
131 the association and logistic regression modeling was done. The information from the interviews  
132 was noted and recorded with the permission of the interviewee. They were transcribed into Nepali  
133 and then translated into English, which was analyzed through the process of thematic analysis by  
134 understanding the main themes of information and coding them into similar themes categories.  
135 The important information from the observation checklist was noted.

136 **Ethical Statement:** The proposal was approved by the Institutional Review Committee (IRC), at  
137 the Manmohan Memorial Institute of Health Science (MMIHS-IRC 619). Study was conducted  
138 from 26<sup>th</sup> November 2021 to 17<sup>th</sup> January 2022. Written Informed consent was taken with each  
139 respondent before data collection for quantitative study while verbal informed consent was taken  
140 for qualitative study. In case of participants below the age of 18 permission was taken from school  
141 principle and their respective class teachers and then assent was taken from each of them.  
142 Participation was voluntary and all ethical considerations, including confidentiality and privacy  
143 were maintained throughout the study process.

144

## 145 **Result**

146 The mean age of the respondents was 17.31±0.99 years. More than half of the participants

147 were 15-17 years old (57.87%), female (55.05%), and were studying in class 12 (55.67%). Only  
 148 13.83% of the participants were married or in a relationship and the relationship status was  
 149 statistically associated ( $p=0.024$ ) with utilization of ASRH. Only about one-third of the  
 150 respondents (30.53%) had conversation with the parents regarding different matters of ASRH.  
 151 However, factors such as age, sex, the class they study in were not significantly associated with  
 152 utilization. Regarding the educational status of parents, 13.89% of them had illiterate father which  
 153 was 28.15 % in case of mother.

154 Almost all (99.28%) of the respondents knew about or were aware of ASRH. Nearly one-third of  
 155 them (30.63%) had not heard about Adolescents Friendly Health Services. More than three-  
 156 quarters (77.40%) of them knew about any health institutions that provided ASRH services in their  
 157 area. Knowledge of ASRH, AFHS and conversation with parents had significant relationship with  
 158 utilization of AHS utilization. (Table 1)

159 **Table 1: Predisposing and enabling factors of ASRHS utilization**

| Variables                                           | Utilization of ASRHS |             | Total     |       | P value |
|-----------------------------------------------------|----------------------|-------------|-----------|-------|---------|
|                                                     | Yes (%)              | No (%)      | Frequency | %     |         |
| <b>Predisposing factors</b>                         |                      |             |           |       |         |
| Age: Mean $\pm$ SD = 17.31 $\pm$ 0.99 years (n=413) |                      |             |           |       |         |
| $\leq$ 17 years                                     | 30 (12.60)           | 209 (87.40) | 239       | 57.87 | 0.592   |
| $>$ 17 years                                        | 25 (14.40)           | 149 (85.60) | 174       | 42.13 |         |
| <b>Sex</b>                                          |                      |             |           |       |         |
| Male                                                | 26 (13.90)           | 161 (86.10) | 187       | 44.95 | 0.710   |
| Female                                              | 29 (12.70)           | 200 (87.30) | 229       | 55.05 |         |
| <b>Level of Education</b>                           |                      |             |           |       |         |
| Grade 11                                            | 24 (12.70)           | 165 (87.30) | 189       | 45.43 | 0.774   |
| Grade 12                                            | 31 (13.70)           | 196 (86.30) | 227       | 55.67 |         |
| <b>Religion</b>                                     |                      |             |           |       |         |
| Hindu                                               | 39 (12.80)           | 266 (87.20) | 305       | 73.32 | 0.665   |
| Others                                              | 16 (14.40)           | 95 (85.60)  | 111       | 26.68 |         |

|                                              |            |             |     |       |        |
|----------------------------------------------|------------|-------------|-----|-------|--------|
| <b>Relationship status (n=412)</b>           |            |             |     |       |        |
| Married/ In Relationship                     | 13 (22.80) | 44 (77.20)  | 57  | 13.83 | 0.024  |
| Single/ Others                               | 42 (11.80) | 313 (88.20) | 355 | 86.27 |        |
| <b>Enabling Factors</b>                      |            |             |     |       |        |
| <b>Father's Education (n=403)</b>            |            |             |     |       |        |
| Illiterate                                   | 8 (14.30)  | 48 (85.70)  | 56  | 13.89 |        |
| Primary school                               | 12 (10.30) | 105 (89.70) | 117 | 29.03 | 0.756  |
| Secondary school                             | 22 (15.30) | 122 (84.70) | 144 | 35.73 |        |
| High school                                  | 6 (16.70)  | 30 (83.30)  | 36  | 8.93  |        |
| Literate only                                | 6 (12.00)  | 44 (88.00)  | 50  | 12.40 |        |
| <b>Mother's Education (n=414)</b>            |            |             |     |       |        |
| Illiterate                                   | 15 (87.10) | 101 (12.90) | 116 | 28.15 | 0.900  |
| Primary school                               | 14 (14.10) | 85 (85.90)  | 99  | 23.91 |        |
| Secondary school                             | 10 (12.20) | 72 (87.80)  | 82  | 1.98  |        |
| High school                                  | 1 (6.30)   | 15 (93.80)  | 16  | 3.86  |        |
| Literate only                                | 15 (14.90) | 86 (85.10)  | 101 | 24.40 |        |
| <b>Heard About ASRH</b>                      |            |             |     |       |        |
| Yes                                          | 55 (13.30) | 358 (87.00) | 413 | 99.28 | 1.000* |
| No                                           | 0 (0.00)   | 3 (100.00)  | 3   | 0.72  |        |
| <b>Known the Institutions providing ASRH</b> |            |             |     |       |        |
| Yes                                          | 52 (16.10) | 270 (83.90) | 322 | 77.40 | 0.004* |
| No                                           | 0 (0.00)   | 25 (100.00) | 25  | 6.00  |        |
| Don't Know                                   | 3 (4.30)   | 66 (95.70)  | 69  | 16.60 |        |
| <b>Heard about AFHS</b>                      |            |             |     |       |        |
| Yes                                          | 49 (16.90) | 240 (83.10) | 289 | 69.47 | 0.001  |
| No                                           | 6 (4.70)   | 121 (95.30) | 127 | 30.63 |        |

| <b>Conversation with parents about ASRH</b>       |            |             |     |       |       |
|---------------------------------------------------|------------|-------------|-----|-------|-------|
| Yes                                               | 26 (20.50) | 101 (79.50) | 129 | 30.53 | 0.004 |
| No                                                | 29 (10.00) | 260 (90.00) | 285 | 69.47 |       |
| <b>Parents support in use of services (n=413)</b> |            |             |     |       |       |
| Yes                                               | 46 (14.60) | 270 (85.40) | 316 | 76.51 | 0.181 |
| No                                                | 9 (9.30)   | 88 (90.70)  | 97  | 23.49 |       |

160

161

162 Almost half of the respondents reported that they had felt the need for ASRH services (48.56%)  
 163 until now. The adolescents' perceived feeling of the need for ASRH services is significantly  
 164 associated with the utilization of ASRH services ( $p < 0.0001$ ). Majority of the respondents  
 165 (88.43%) felt the need for separate and specific services for adolescents. Nearly two third (65.62%)  
 166 thought that their decision on ASRH service utilization would be affected by the gender of the  
 167 service provider. However, their perception of the need for separate and specific services for  
 168 adolescents and the effect of the sex of the service provider were not significantly associated with  
 169 the utilization of ASRH services. Only two third (66.59%) of the respondents thought they would  
 170 use the service in the future if needed. Those who were willing to use ASRH service if needed in  
 171 the future were significantly associated with the utilization of services. The respondents who  
 172 intended to use the services in future were 5.882 times more likely to utilize ASRH services  
 173 compared to those who were not sure of it (COR= 5.882, 95% C.I= 2.070-16.717).

174 For the more than 2/3<sup>rd</sup> of respondents (68.94%), the nearest health institution was less than 30  
 175 minutes walking distance from their home. However, information/ awareness about ASRH and the  
 176 distance to the health institution from home were not significantly associated with the utilization.  
 177 Majority of the respondents (82.13%) reported the need of convenient opening hour which was  
 178 significantly associated with the utilization of ASRHS. (Table 2)

179 **Table 2: Need and External Environmental factors of ASRHS utilization**

| Variables | Utilization of SRHS |        | Total | P value |
|-----------|---------------------|--------|-------|---------|
|           | Yes (%)             | No (%) |       |         |
|           |                     |        |       |         |



|                                                             |             |             |     |       |         |
|-------------------------------------------------------------|-------------|-------------|-----|-------|---------|
| <b>Need Factors</b>                                         |             |             |     |       |         |
| <b>Felt need of service</b>                                 |             |             |     |       |         |
| Yes                                                         | 55 (100.00) | 147(40.70)  | 202 | 48.56 | < .0001 |
| No                                                          | 0 (0.00)    | 214 (59.30) | 214 | 51.44 |         |
| <b>Perceived need of separate service (n=415)</b>           |             |             |     |       |         |
| Yes                                                         | 48 (13.10)  | 319 (86.90) | 367 | 88.43 | 0.773   |
| No                                                          | 7 (14.60)   | 41 (85.40)  | 48  | 1157  |         |
| <b>Use in future if needed</b>                              |             |             |     |       |         |
| Yes                                                         | 49 (17.80)  | 227 (82.20) | 276 | 66.35 | 0.001   |
| No                                                          | 2 (7.40)    | 25 (92.60)  | 27  | 6.49  |         |
| Don't Know                                                  | 4 (3.50)    | 109 (96.50) | 113 | 27.16 |         |
| <b>External environmental factors</b>                       |             |             |     |       |         |
| <b>Distance to health institution (n=322)</b>               |             |             |     |       |         |
| <30 minutes walking distance                                | 34 (15.30)  | 188 (84.70) | 222 | 68.94 | 0.641   |
| 30 minutes to 1 hour walking distance                       | 11 (16.20)  | 57 (83.80)  | 68  | 21.12 |         |
| >1 hour walking distance                                    | 7 (21.90)   | 25 (78.10)  | 32  | 9.94  |         |
| <b>Necessity of Convenient Opening hours of institution</b> |             |             |     |       |         |
| Yes                                                         | 53 (15.60)  | 287 (84.40) | 340 | 82.13 | 0.010   |
| No                                                          | 2 (2.70)    | 72 (97.30)  | 74  | 17.87 |         |
| <b>Perceived Community support</b>                          |             |             |     |       |         |
| Yes                                                         | 38 (15.70)  | 204 (84.30) | 242 | 58.31 | 0.082   |
| No                                                          | 17 (9.80)   | 156 (90.20) | 173 | 41.69 |         |
| <b>Perceived Religious and cultural beliefs/Barriers</b>    |             |             |     |       |         |
| Yes                                                         | 20 (14.40)  | 119 (85.60) | 139 | 33.41 | 0.619   |
| No                                                          | 35 (12.60)  | 242 (87.40) | 277 | 66.59 |         |
| <b>Perceived Effect of sex of service provider (n=413)</b>  |             |             |     |       |         |

|     |            |             |     |       |       |
|-----|------------|-------------|-----|-------|-------|
| Yes | 36 (13.30) | 235 (86.70) | 271 | 65.62 | 0.862 |
| No  | 18 (12.70) | 124 (87.30) | 142 | 34.38 |       |

180

181

182 The respondents who had conversation with their parents about ASRH were 2.308 times more  
 183 likely to utilize ASRH services than the respondents who did not have conversation with parents  
 184 on ASRH related matters (COR=2.308, 95% C.I= 1.296, 4.110). The respondents who knew about  
 185 AFHS were 4.117 times more likely to utilize services than the respondents who were not aware  
 186 about AFHS (COR=4.117, 95% C.I= 1.716, 9.881). The respondents who knew about the health  
 187 institutions providing ASRH services are 4.237 more likely to use services compared to the ones  
 188 who did not know about it (COR=4.237, 95% C.I= 1.283 – 13.990). Because of the no respondents  
 189 who use ASRHS without the felt need of services and Knowledge about Institutions providing  
 190 ASRH, logistic regression was not applicable even though they were significant factors in utilizing  
 191 ASRHSs. (Table 3)

192

193 **Table 3:** Factors associated with utilization of ASRH services by using multiple logistic regression

| Factor                                      | Utilization of services |             | 95%CI<br>(lower-upper<br>limit) | AOR   | p-<br>value |
|---------------------------------------------|-------------------------|-------------|---------------------------------|-------|-------------|
|                                             | Yes<br>n (%)            | No<br>n (%) |                                 |       |             |
| <b>Conversation with parents about ASRH</b> |                         |             |                                 |       |             |
| Yes                                         | 26 (20.50)              | 101 (79.50) | 1.094 – 3.912                   | 2.069 | 0.25        |
| No                                          | 29 (10.00)              | 260 (90.00) | Ref                             |       |             |
| <b>Heard about AFHS</b>                     |                         |             |                                 |       |             |
| Yes                                         | 49 (16.90)              | 240 (83.10) | 1.129 – 7.013                   | 2.814 | 0.026       |
| No                                          | 6 (4.70)                | 121 (95.30) | Ref                             |       |             |

| <b>Availability of health institution providing ASRH services</b> |            |             |                |       |       |
|-------------------------------------------------------------------|------------|-------------|----------------|-------|-------|
| Yes                                                               | 52 (16.10) | 270 (83.90) | 0.810 – 9.687  | 2.801 | 0.104 |
| No                                                                | 0 (0.00)   | 25 (100.00) |                | 0.00  | 0.998 |
| Don't Know                                                        | 3 (4.30)   | 66 (95.70)  | Ref            |       |       |
| <b>Comfortable opening hours</b>                                  |            |             |                |       |       |
| Yes                                                               | 53 (15.60) | 287 (84.40) | Ref            |       |       |
| No                                                                | 2 (2.70)   | 72 (97.30)  | 0.039 – 0.716  | 0.167 | 0.16  |
| <b>Willingness to Use service in future</b>                       |            |             |                |       |       |
| Yes                                                               | 49 (17.80) | 227 (82.20) | 1.623 – 13.997 | 4.766 | 0.005 |
| No                                                                | 2 (7.40)   | 25 (92.60)  | 0.323 - 12.278 | 1.993 | 0.457 |
| Don't know                                                        | 4 (3.50)   | 109 (96.50) | Ref            |       |       |

194

195

196

### 197 **Characteristics related to Utilization of services by Respondents**

198 The utilization of the ASRH by the respondents. Very few of them (13.22%) had ever used ASRH  
 199 services till now among them maximum used those services in government health institutions  
 200 (69.01%). Most of them got general health checkup and general health information counseling  
 201 services and condom collection and family planning services. The reasons for not using services  
 202 were, mostly because they did not think they needed the service (60.39%). Other reasons were  
 203 them not being interested in using such services (38.23%), ashamed to ask for services (26.31%)  
 204 and not knowing where to get such services (20.22%). Some of them (7.48%) also responded that  
 205 opposite sex of the service providers was also the reason. Around half of them (52.73%) had paid  
 206 for the services. Most of them (81.82%) had seen IEC materials in institute. Around 40.00% did  
 207 not have to wait or only waited <30 minutes for services. Three fourth (70.91%) of them were  
 208 comfortable to ask the questions. Almost all (90.91%) said that they were given proper attention  
 209 by health workers. Less than one fourth (14.55%) of them felt that privacy was not maintained at

210 all. Almost all of them (94.55%) would recommend others to go to the health institutions. (Table  
 211 4)

212

213 **Table 4: Characteristics related to experience during Utilization of ASRH services**

| Characteristics                       | Frequency (n=55) | Percentage (%) |
|---------------------------------------|------------------|----------------|
| <b>Used ASRH</b>                      | <b>(n=416)</b>   |                |
| Yes                                   | 55               | 13.22          |
| No                                    | 361              | 86.78          |
| <b>Institution where service use</b>  | <b>(n=55)</b>    |                |
| Government institutes                 | 38               | 69.09          |
| Private institutes                    | 17               | 30.91          |
| <b>Service Used *</b>                 | <b>(n=55)</b>    |                |
| General Health Check up               | 35               | 63.63          |
| Family planning                       | 6                | 10.91          |
| General health information            | 33               | 60.00          |
| Condom collection                     | 11               | 20.00          |
| Counseling services                   | 13               | 23.64          |
| Others                                | 4                | 7.28           |
| <b>Reason for not using service *</b> | <b>(n=361)</b>   |                |
| Don't know where to get services      | 73               | 20.22          |
| Not interested in such service        | 138              | 38.23          |
| Fear of parents                       | 22               | 6.09           |
| Behavior of service provider          | 2                | 0.56           |
| Religion/Culture barrier              | 12               | 3.32           |
| Ashamed to ask for services           | 95               | 26.31          |
| Inconvenient opening hours            | 22               | 6.09           |
| No Money to get services              | 11               | 3.05           |
| Health facility's distance from home  | 15               | 4.16           |
| opposite sex of service provider      | 27               | 7.48           |

|                                        |     |       |
|----------------------------------------|-----|-------|
| Did not think service was needed       | 218 | 60.39 |
| <b>Paid for the service</b>            |     |       |
| Yes                                    | 29  | 52.73 |
| No                                     | 26  | 47.27 |
| <b>Sex of service provider</b>         |     |       |
| Male                                   | 20  | 36.36 |
| Female                                 | 35  | 63.64 |
| <b>IEC Materials in HF</b>             |     |       |
| Yes                                    | 45  | 81.82 |
| No                                     | 10  | 18.18 |
| <b>Waiting time during service use</b> |     |       |
| No waiting                             | 22  | 40.00 |
| < 30 min                               | 24  | 43.63 |
| > 30 min                               | 9   | 16.37 |
| <b>Comfort to ask questions</b>        |     |       |
| Yes                                    | 39  | 70.91 |
| No                                     | 16  | 29.09 |
| <b>Proper attention by HW</b>          |     |       |
| Yes                                    | 50  | 90.91 |
| No                                     | 5   | 9.09  |
| <b>Maintenance of privacy</b>          |     |       |
| Not at all                             | 8   | 14.55 |
| maintained but not enough              | 16  | 29.09 |
| Satisfactory                           | 10  | 18.18 |
| very good/ maintained well             | 21  | 38.18 |
| <b>Recommend others</b>                |     |       |
| Yes                                    | 52  | 94.55 |
| No                                     | 3   | 5.45  |

214

215

216 The KII among health workers mentioned that the number of adolescents visiting health  
 217 institutions was less and those visiting for SRH-related services were rare. However, there was no  
 218 separate recording system for adolescents, so accurate information about the number of adolescent  
 219 visits was unavailable. The ones visiting the institutions would come for general reasons like fever,  
 220 first-aid, or other OPD services. The barriers identified in the delivery of services to adolescents  
 221 were that the infrastructure was not adolescent-friendly such as separate rooms, proper waiting  
 222 spaces, the unavailability of appropriate IEC materials, and the unavailability of trained health  
 223 workers to provide specific ASRH services. The health institutions only provided limited services  
 224 like General health check-ups, health information, counseling services, family planning services,  
 225 and pregnancy tests. They were not able to give comprehensive services to adolescents.

226 While observing the health institutions, all three were once certified as adolescent-friendly health  
 227 institutions, but currently, they did not meet any specific criteria of being adolescents friendly.  
 228 There was no supply of ASRH-specific IEC materials, no trained health workers, no adolescent  
 229 job aid was available, none of them had displayed the AFS logo, reporting in AFs format was null,  
 230 and involvement of the adolescents in HFOMC was not in practice. Criteria met to some extent  
 231 were the convenient location of the health institution, toilets with clean water and dustbin,  
 232 maintenance of privacy as far as possible while providing service, and counseling. Even though  
 233 those health institutions were once certified as AF institutions, due to a lack of proper monitoring  
 234 and follow-up, they could not maintain that status anymore. (Table 5)

235

236

237 **Table 5: List of codes obtained on Thematic Analysis**

| Themes | Domain                                                 | Codes | Codes description                                                                                                                        |
|--------|--------------------------------------------------------|-------|------------------------------------------------------------------------------------------------------------------------------------------|
|        | <b>Current situation of I ASRH service utilization</b> |       | • Very Few Adolescents visits and lesser for SRH specific issues                                                                         |
|        |                                                        |       | • They visit for: Height/ Weight, blood pressure measurement, collecting condom (Boys)<br>Girls for abdominal pain during menstruation,) |
|        |                                                        |       | • Available services: General health check -ups, Health information,                                                                     |

|                                                                                                                                                                                                                                                            |                                                                  |     |                                                                                              |                              |
|------------------------------------------------------------------------------------------------------------------------------------------------------------------------------------------------------------------------------------------------------------|------------------------------------------------------------------|-----|----------------------------------------------------------------------------------------------|------------------------------|
| <b>Utilization of SRH services by adolescents from service providers' perspective</b>                                                                                                                                                                      |                                                                  |     | Counseling,<br>Family planning devices, Pregnancy test                                       |                              |
|                                                                                                                                                                                                                                                            | <b>Barriers for adolescents to utilize SRH services</b>          | II  | • Not well informed about available services                                                 | • Have Privacy concerns      |
|                                                                                                                                                                                                                                                            |                                                                  |     | • Cannot recognize the need and seek for services                                            | • Gender of service provider |
|                                                                                                                                                                                                                                                            |                                                                  |     | • No trust in the quality of services/ competency of HWs of government health institute      |                              |
|                                                                                                                                                                                                                                                            | <b>Barriers for health institutions to provide ASRH services</b> | III | • Infrastructure is not Adolescents Friendly                                                 |                              |
|                                                                                                                                                                                                                                                            |                                                                  |     | • No trained health worker for ASRH service delivery                                         |                              |
|                                                                                                                                                                                                                                                            |                                                                  |     | • Not able to provide all the services needed for adolescents                                |                              |
|                                                                                                                                                                                                                                                            |                                                                  |     | • No Supply of IEC materials related specific to adolescents                                 |                              |
|                                                                                                                                                                                                                                                            |                                                                  |     | • Lack of coordination with stakeholders like Municipality and schools                       |                              |
|                                                                                                                                                                                                                                                            | <b>Possible solutions (from health institutions)</b>             | IV  | • Reaching out with information about ASRH and services to adolescents/<br>Awareness raising |                              |
| <ul style="list-style-type: none"> <li>• Mobilize FCHV's in community</li> <li>• Discussions in mothers group meetings</li> <li>• Coordination with school</li> <li>• Through Mothers who come for checkups</li> <li>• Distribute IEC materials</li> </ul> |                                                                  |     |                                                                                              |                              |
| • Co-ordinate with school to conduct SHP and take few classes for students.                                                                                                                                                                                |                                                                  |     |                                                                                              |                              |
| • Organize camps specific for adolescents                                                                                                                                                                                                                  |                                                                  |     |                                                                                              |                              |
| • Provide service by same sex health worker as far as possible                                                                                                                                                                                             |                                                                  |     |                                                                                              |                              |
| • Maintain Privacy and Confidentiality.                                                                                                                                                                                                                    |                                                                  |     |                                                                                              |                              |

## 240 Discussion

241 This study shows that respondents who were either married or were in a relationship were  
242 2.202 times more likely to utilize ASRH services than the respondents who were single (Crude  
243 OR=2.202, 95% C.I= 1.096, 4.423) more likely to utilize ASRH services than those who were  
244 single. It is complemented by studies in the Bhaktapur and also in Surkhet among secondary school  
245 students (10-24 years), where 77.08% of the married youths benefitted from the services more than  
246 the unmarried youths.(13)(14) In Bhaktapur, it was observed that a married person was six times  
247 more likely to utilize ASRH services than unmarried persons (Crude OR: 6.51).(13) This may be  
248 due to the fact that there are stigma attached with use of SRH related services by young and  
249 unmarried individuals but for those who are married or in relationship, they are more sexually  
250 active and their needs for SRH services increase resulting in the use of such services.

251 This study identified that the respondents who had conversations with their parents about ASRH  
252 were 2.308 times more likely to utilize ASRH services than who did not which is comparable to a  
253 study in Ethiopia, where those who had a parental discussion on VCT services were ten times more  
254 likely to utilize the service compared to those who had no parental communication.(15) However,  
255 it contradicts the study among youths in Kathmandu where respondents having distinct interaction  
256 with parents were 2 times more likely to utilize SRH services than those having close interaction  
257 (OOR: 2.424). (16) The difference may have been due to the difference in the nature of participants  
258 in both studies as study in Kathmandu included participants up to 24 years age who may have been  
259 able to independently decide to utilize services and did not need communication with parents.

260 Around three-quarters (77.40%) of them knew about any health institutions that provided ASRH  
261 services in their area and more than two third of them had heard about AFHS. The respondents  
262 who were aware about these were more likely to use services compared to the others. It concedes  
263 with other studies in Bhaktapur and Dang where there was a significant association too.(13)(17)  
264 This is because lack of information about the kind of ASRH services available is one of the  
265 important barrier to utilizing services, so having any awareness about ASRH or AFHS would be  
266 enabling factor towards acquiring those services. For the many respondents (68.94%), the nearest  
267 health institution was less than 30 minutes walking distance from their home. Even though distance  
268 was not identified as major barrier to utilization of services in this study, other studies in Bhaktapur  
269 and Dhading has identified it as an important aspect of accessing ASRH services.(13)(18)



270 Almost half of the respondents reported that they had felt the need for ASRH services until now,  
271 which similar to study in Pyuthan (44%) but is very high compared to the study in Bhaktapur  
272 (15%) among participants within the last 12 months.(19)(13)The figure is higher in this research  
273 as it collects the information of their needs in their entire life whereas the one in Bhaktapur only  
274 takes into consideration the last 12 months from the time of data collection. Two third (66.59%)  
275 of the respondents thought they would use the service in the future if needed which is almost  
276 double than that of study in Pokhara (34.70%) and Bhaktapur (37.00%).(20)(13)

277 This study found that the overwhelming majority of adolescents were not utilizing SRH services.  
278 Only 13.22% of participants have ever used SRH services to date. This finding is supported by the  
279 qualitative study of this research too. In the KII, the health workers mentioned that the service  
280 utilization by adolescents is very low, and those specific to SRH-related issues are very rare.  
281 Likewise, in the studies of similar nature conducted in Bhaktapur in 2015 and Pokhara in 2018,  
282 the utilization was only 9.2% and 17% respectively.(13)(20)Similarly, the household surveys in  
283 Kathmandu valley among the youths (15-24 years) and Bhaktapur district among adolescents (10-  
284 19 years) in 2020 also show low utilization of services which is 23% and 24.7%.(21)(22) A recent  
285 survey conducted in three states across India found that young men and women (aged 15–24 years)  
286 seldom consulted CHWs for issues related to sexual health.(23) The service use is lower in this  
287 study than that demonstrated in another study conducted in Pyuthan (44.0%), and also in Myanmar  
288 where around two-thirds of youths used some RH services at least once in past.(19)(24) This  
289 difference might be due to a different study setting.

290 In this research, the primary reason for not using services was because adolescents did not think  
291 the service was needed (60.39%), which is comparable to the study conducted in Puthyan district,  
292 where 56% revealed that they did not feel any sexual and reproductive health related problem;  
293 hence they did not go to the health facility.(19) Also, in KII of this study, all health workers  
294 mentioned that due to the immature age of adolescents and the multiple changes occurring in their  
295 bodies at that age, they are incapable of identifying when they need to get services from health  
296 institutions.

297 Another important reason according to adolescents was that they did not know exactly where to  
298 get services. This barrier were acknowledged by services providers too in KII, who mentioned that  
299 the adolescents did not visit the health institution because they did not have adequate information

300 about what kinds of services are available at the health institution and adolescents would also doubt  
301 that their problems can be addressed in local level government health institutions. Lack of  
302 knowledge and information about AFHS was one of the most commonly reported barriers to  
303 service utilization by adolescents in the study conducted by UNFPA in Nepal in 2015. (25)

304 From adolescent's point of view, other reasons for not utilizing ASRH services were being shy to  
305 ask for services, fear of parents, and the opposite gender of the service provider. In KII, service  
306 providers also mentioned that at the health institutions, the sex of the service provider would  
307 determine how comfortable the adolescents were to share the problems and could also avoid  
308 coming to a health facility if the service provider were of the opposite gender. Similarly, around  
309 43.64% of the participants who used the services were unsatisfied with the level of privacy  
310 maintained which is also realized by service providers in KII as an important concern because of  
311 which, adolescents would rather go to private institutions or institutions that were far from their  
312 locality than be seen going to local health institutions by the community people. Research by  
313 Upadhyay P on sexual and reproductive health services: utilization pattern of adolescents in Nepal  
314 mentioned female adolescents felt embarrassed to express their sexual health problems to male  
315 health workers, and the male had similar experiences with female health workers.(19) A journal  
316 article published in KMUJ in 2008: Sexual and reproductive health status among young peoples  
317 in Nepal: opportunities and barriers for sexual health education and services utilization also reveals  
318 similar reasons like fear of parents, unawareness about the benefits of the services, and lack of  
319 information.(4) Poor sexual and reproductive health knowledge, lack of privacy, experiences of  
320 shame, and healthcare provider attitudes caused barriers to utilizing SRH services by  
321 adolescents.(26) Studies in Nigeria and India showed that the majority of adolescents who  
322 contracted STI or other reproductive health problems did not use reproductive health services for  
323 several reasons, including shame and embarrassment, negative provider attitudes, perceived lack  
324 of Confidentiality, fear of being ridiculed, and discrimination they face by some health service  
325 staff in accessing contraceptive, sexually transmitted infection services or other services.(27)

326 The barriers identified in the delivery of services to adolescents were the unavailability of  
327 adolescent-friendly infrastructure such as separate rooms or proper waiting spaces, the  
328 unavailability of ASRH-trained health workers, and inadequate availability of necessary supplies.  
329 A similar finding was found in Kaski where the poor physical infrastructure of health institutions  
330 was expressed as one of the barriers by all health workers while providing services and the majority

331 of health workers also expressed their dissatisfaction with not receiving appropriate training.(28)  
332 In a qualitative study conducted in Dhading district in Nepal, among adolescents and health care  
333 providers, the shortage of ASRH-trained Health Care Providers in health facility which resulted in  
334 the allocation of non-ASRH-trained HCPs, were identified as an important factor compromising  
335 the quality of health care provided to adolescents.(18) Poor sexual and reproductive health  
336 knowledge, the lack of youth-friendly services, lack of confidentiality of services, experiences of  
337 shame, and healthcare provider attitudes also have an influence on SRH service utilization by  
338 adolescents.(26) A study conducted in Colombia in 2015 to evaluate youth-friendly health  
339 services, concluded lack of trained health workers in sexual and reproductive health and the high  
340 instability of health workers have a negative impact on the provision of services.(29) Another  
341 barrier was the inability of health institutions to provide comprehensive services as they were  
342 capacitated to provide only limited services needed. A review article published in 2008, reported  
343 that current sexual and reproductive health services in Nepal do not cover a whole range of SRH  
344 services that adolescents need and they need to refer to the higher level health facility.(4) A study  
345 conducted among 338 higher secondary school adolescents in Bhaktapur reported that 30% of  
346 participants feel that currently available services are inadequate to meet their SRH needs.(13)

347 While observing the health institutions there was no supply of IEC materials specifically designed  
348 for ASRH, none of them had displayed the AFS logo, reporting in AFs format was null, and  
349 involvement of the adolescent in HFOMC was not in practice. Even though those health  
350 institutions were once certified as AF institutions, due to a lack of proper monitoring and follow-  
351 up, they were not able to maintain that status anymore. The situation was similar in the observation  
352 of four health institutions in Kaski.(28) National Adolescent Sexual and Reproductive Health  
353 Programme: Mid-Term Evaluation Report, 2013, mentioned that ‘AFS logo signboard’ is helpful  
354 to attract adolescents as it informs adolescents that services are available.(30)

355

## 356 **Conclusion**

357 Most of the participants were 15-17 years old, female, and were studying in class 12. Very  
358 few were married and few were in a relationship. About one-third of the participants had a  
359 conversation with the parents regarding different matters of ASRH. Many knew about any health

360 institutions that provided ASRH services in their area. The nearest health institution was less than  
361 30 minutes walking distance from the home for the majority of respondents. Only a few had heard  
362 about AFHS. Even though many had felt the need for ASRH services in their lifetime, many were  
363 still unsure about using services in the future; few were sure they would not use them. The  
364 utilization of ASRH services during their lifetime was very low. The main reason was that the  
365 adolescents thought it was not required to go to health institutions for their problems.

366 Overall, poor utilization of SRH services by adolescents was due to the inability of adolescents to  
367 identify their health needs as a result, thinking that they do not need health services, being  
368 uninterested in using such services, being ashamed to ask for services, did not know exactly where  
369 to get them, poor availability of AF health institutions and services, inability to provide  
370 comprehensive services, inadequate availability of necessary supplies, lack of trained human  
371 resources and so on. So, to increase the utilization, awareness should be generated among  
372 adolescents of their ASRH needs and available ASRH services in health institutions through  
373 mutual coordination with schools because it is their vital source of information. Similarly,  
374 adolescent-friendly infrastructure and environment and trained health personnel should be  
375 managed to provide services.

376

377

378

379

380

381

382

383

384 **Conflict of interest**

385 None

386 **Acknowledgements**

387 Immense Gratitude towards the Health coordinator of Godawari Municipality, Mr. Rewati  
388 Raj Karki for his support to conduct the research among health institutions of the Municipality as  
389 well as all the schools for their support. The support from all the members of faculty of public  
390 health, Manmohan Memorial Institute of Health Sciences is also appreciative. Above all, cordial  
391 thanks to all the respondents for their time without whom this study would not have been possible.

392

## 393 **References**

394

395 1. Adolescent health [Internet]. [cited 2024 May 1]. Available from: [https://www.who.int/health-](https://www.who.int/health-topics/adolescent-health)  
396 [topics/adolescent-health](https://www.who.int/health-topics/adolescent-health)

397 2. UNFPA. International Conference on Population and Development, Cairo 5-13 September  
398 1994 -- IAC presence. 1995.

399 3. WHO. Adolescent friendly health services. 2011;46(SUPPL.1):1–3.

400 4. Regmi P, Simkhada P, Van Teijlingen E. Sexual and reproductive health status among young  
401 people in Nepal: Opportunities and barriers for sexual health education and services utilization.  
402 Kathmandu Univ Med J. 2008;6(22):248–56.

403 5. Tamang L, Raynes-Greenow C, McGeechan K, Black KI. Knowledge, experience, and  
404 utilisation of sexual and reproductive health services amongst Nepalese youth living in the  
405 Kathmandu Valley. Sex Reprod Healthc. 2017 Mar 1;11:25–30.

406 6. Pandey A. Challenges Experienced by Adolescent Girls while Menstruation in Kathmandu,  
407 Valley: A Qualitative Study. J Community Med Health Educ. 2014 Jan 1;04.

408 7. Adhikari N, Uddin S, Sapakota K, Adhikari S. Sexual and Reproductive Health Needs and  
409 Service Utilization among Adolescents in Nepal. Am J Public Health. 2020 Apr 2;8:47–53.

410 8. Nepal Demographic and Health Survey 2022 [Internet]. [cited 2024 May 1]. Available from:  
411 <https://dhsprogram.com/pubs/pdf/FR379/FR379.pdf>

412 9. Reaching adolescents with health services in Nepal. Bull World Health Organ. 2017 Feb  
413 1;95(2):90–1.

414 10. Regmi PR, Teijlingen E van, Simkhada P, Acharya DR. Barriers to Sexual Health Services  
415 for Young People in Nepal. J Health Popul Nutr. 2010;28(6):619–27.

416 11. Regmi P, Simkhada P, Van Teijlingen ER. Sexual and reproductive health status among  
417 young peoples in Nepal: opportunities and barriers for sexual health education and services  
418 utilization. Kathmandu Univ Med J KUMJ. 2008;6(2):248–56.

- 419 12. What Does Not Work in Adolescent Sexual and Reproductive Health: A Review of Evidence  
420 on Interventions Commonly Accepted as Best Practices - PMC [Internet]. [cited 2024 May 1].  
421 Available from: <https://www.ncbi.nlm.nih.gov/pmc/articles/PMC4570008/>
- 422 13. Bam K, Haseen F, BC RK, Newman MS, Chaudhary AH, Thapa R, et al. Perceived Sexual  
423 and Reproductive Health Needs and Service Utilization among Higher Secondary School  
424 Students in Urban Nepal. *Am J Public Health Res.* 2015;3(2):36–45.
- 425 14. Khanal SP. Multi-level Barriers for Utilization of Youth Friendly Reproductive Health  
426 Services (YFRHS) among Youths. *J Health Promot.* 2020;8(June):95–108.
- 427 15. Feleke SA, Koye DN, Demssie AF, Mengesha ZB. Reproductive health service utilization  
428 and associated factors among adolescents (15-19 years old) in Gondar town, Northwest Ethiopia.  
429 *BMC Health Serv Res.* 2013;13(1):1–10.
- 430 16. Pokhrel S, Nepal S, Mali P, Baskota S, Aryal R, Thapa A, et al. Utilization and associated  
431 factors of sexual and reproductive health services among adolescents of Kathmandu district,  
432 Nepal. *Int J Community Med Public Health.* 2020;7(12):4737.
- 433 17. Giri N, Shrestha S, Uprety S, Sangroula RK. Utilization of adolescent friendly health services  
434 and its associated factors in Dang district of Nepal. *Int J Community Med Public Health.*  
435 2020;7(8):2931.
- 436 18. Pandey PL, Seale H, Razee H. Exploring the factors impacting on access and acceptance of  
437 sexual and reproductive health services provided by adolescent-friendly health services in Nepal.  
438 2019;14(8):1–19.
- 439 19. Upadhyay P. Sexual and Reproductive Health Services: Utilization Pattern of Adolescents in  
440 Nepal. *NEHU J.* 2013;9781447144:325–36.
- 441 20. Dhakal S. Factors Influencing Access and Utilization of Sexual and Reproductive Health  
442 Services Among Secondary School Students of Pokhara Metropolitan City. 2018;
- 443 21. Tamang L, Raynes-Greenow C, McGeechan K, Black KI. Knowledge, experience, and  
444 utilisation of sexual and reproductive health services amongst Nepalese youth living in the  
445 Kathmandu Valley. *Sex Reprod Healthc.* 2017;11:25–30.
- 446 22. Napit K, Shrestha KB, Magar SA, Paudel R, Thapa B, Dhakal BR, et al. Factors associated  
447 with utilization of adolescent-friendly services in Bhaktapur district, Nepal. *J Health Popul Nutr.*  
448 2020;39(1):2.
- 449 23. Srivastava NM. Adolescent health in India: Need for more interventional research. *Clin*  
450 *Epidemiol Glob Health.* 2016;4(3):101–2.
- 451 24. Thin Zaw PP, Liabsuetrakul T, Htay TT, McNeil E. Equity of access to reproductive health  
452 services among youths in resource-limited suburban communities of Mandalay City, Myanmar.  
453 *BMC Health Serv Res.* 2012;12(1):1–12.

- 454 25.FHD, UNFPA Nepal, CREHPA. The Qualitative Study on Assessing Supply Side Constraints  
455 Affecting the Quality of Adolescent Friendly Health Services and the Barriers for Service  
456 Utilization in Nepal. UNFPA Nepal. 2015;(January).
- 457 26.Newton-Levinson A, Leichter JS, Chandra-Mouli V. Sexually Transmitted Infection  
458 Services for Adolescents and Youth in Low- and Middle-Income Countries: Perceived and  
459 Experienced Barriers to Accessing Care. *J Adolesc Health*. 2016;59(1):7–16.
- 460 27.Wood K, Aggleton P. Promoting Young People’s Sexual and Reproductive Health: Stigma,  
461 Discrimination and Human Rights. *Safe Passages Adulthood*. 2004;5.
- 462 28.Shrestha S, Wærdahl R. Girls’ access to adolescent friendly sexual and reproductive health  
463 services in Kaski, Nepal. *Asia Pac Policy Stud*. 2020;7(3):278–92.
- 464 29.Huaynoca S, Svanemyr J, Chandra-Mouli VC, Moreno Lopez DJ. Documenting good  
465 practices: Scaling up the youth friendly health service model in Colombia. *Reprod Health*.  
466 2015;12(1):1–13.
- 467 30.Government of Nepal Ministry of Health and Population Family Health Division. National  
468 Adolescent Sexual and Reproductive Health Program.Mid-Term Evaluation Report. 2011.  
469
